# Supplementary material for: A novel BODIPY-Schiff base-based colorimetric and fluorometric dosimeter for Hg2+, Fe3+ and Au3+
Source: Royal Society of Chemistry journal article supplement (doi:10.1039/c5ra15546k), 2015-01-01
Supplement: c5ra15546k1.pdf [file c5ra15546k1.pdf]

## Supporting Information

### A Novel BODIPY-Schiff base-based Colorimetric and Fluorometric Dosimeter for Hg<sup>2+</sup>, Fe<sup>3+</sup> and Au<sup>3+</sup>

Huan-ren Cheng, Ying Qian,\*

<sup>a</sup>School of Chemistry and Chemical Engineering, Southeast University, Nanjing, 211189, China

<sup>b</sup>National Center for Nanoscience and Technology, Beijing, 100190, China

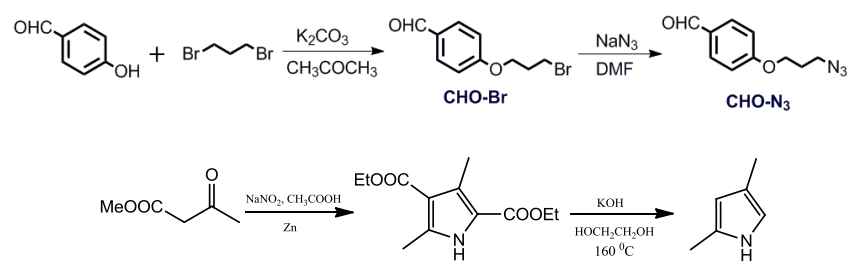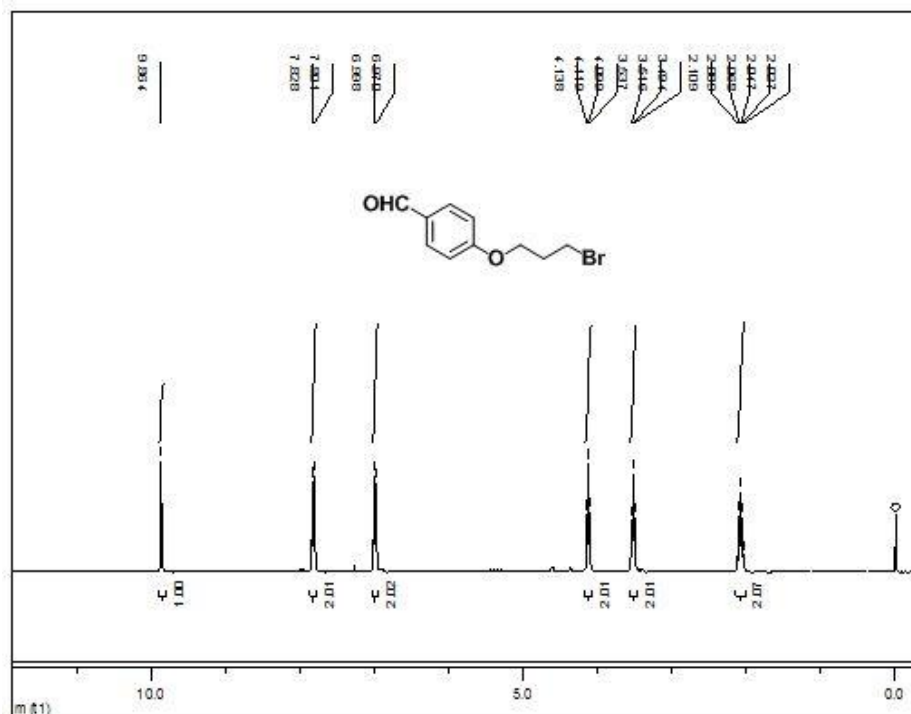

Fig. S1 <sup>1</sup>H NMR spectrum of compound CHO-Br

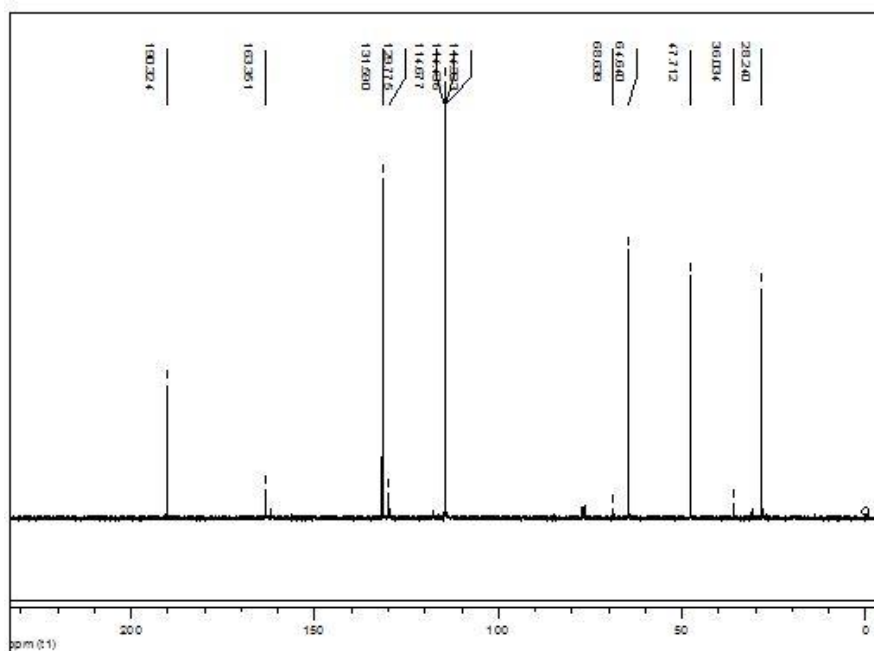

**Fig. S2**  $^{13}\text{C}$  NMR spectrum of compound **CHO-Br**

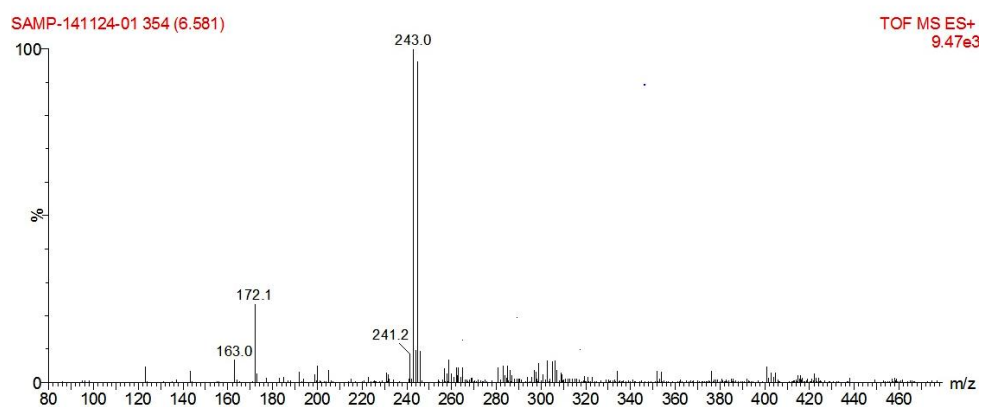

**Fig. S3** Mass Spectrum of compound **CHO-Br**

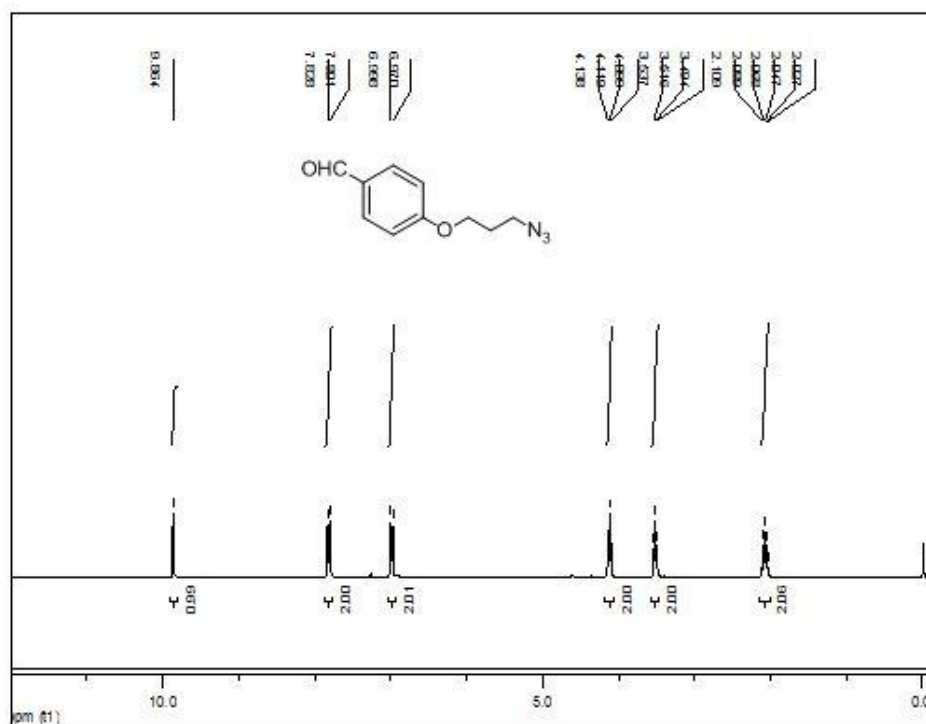

Fig. S4 <sup>1</sup>H NMR spectrum of compound CHO-N<sub>3</sub>

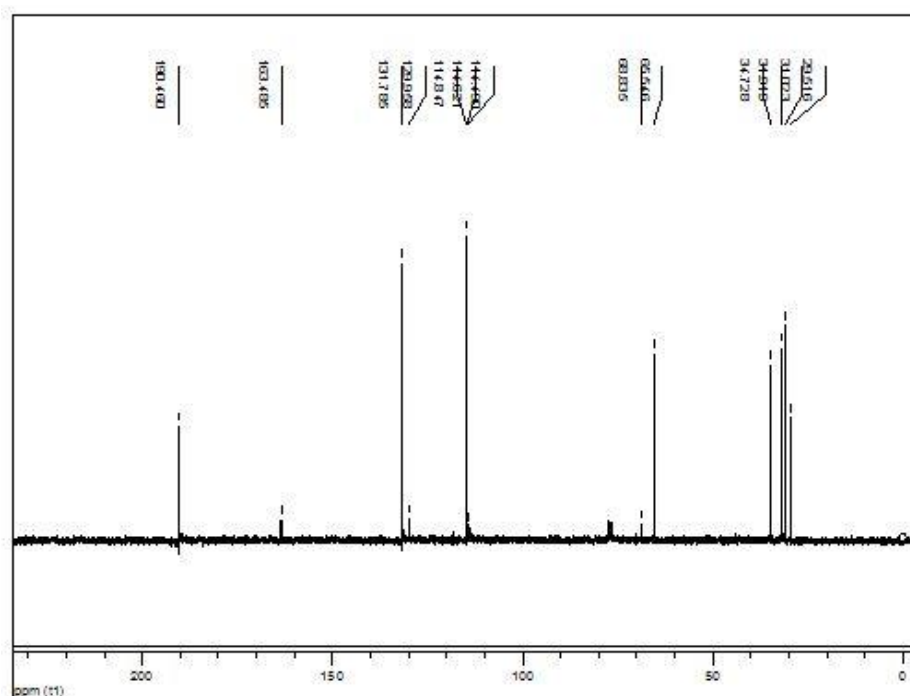

Fig. S5 <sup>13</sup>C NMR spectrum of compound CHO-N<sub>3</sub>

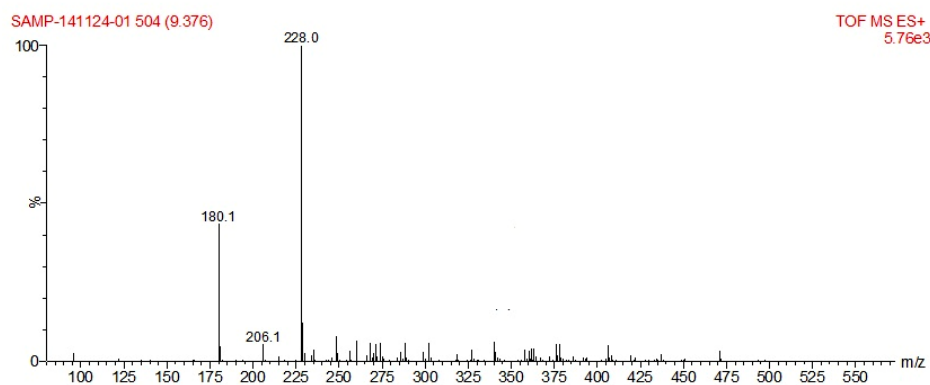

**Fig. S6** Mass Spectrum of compound **CHO-N<sub>3</sub>**

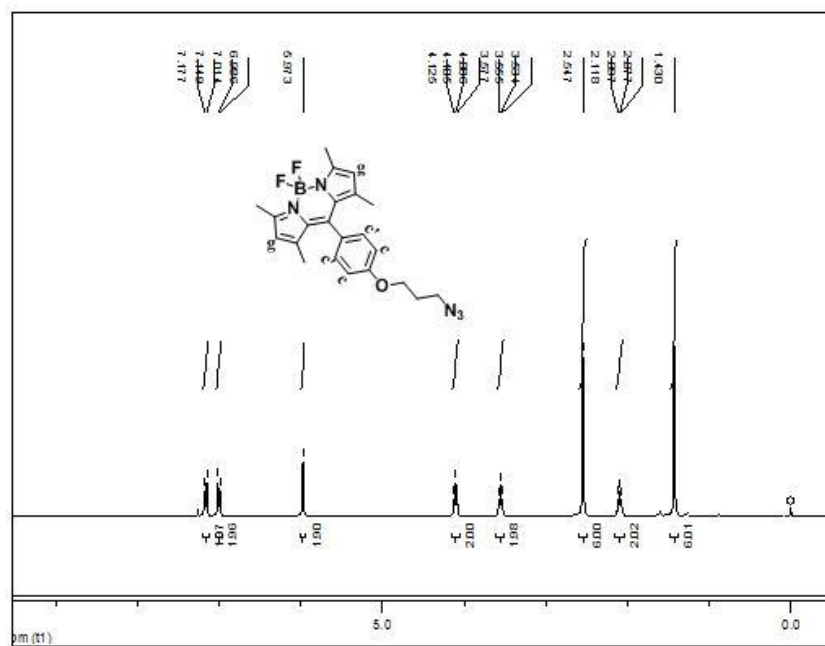

**Fig. S7** <sup>1</sup>H NMR spectrum of compound **BODIPY-1**

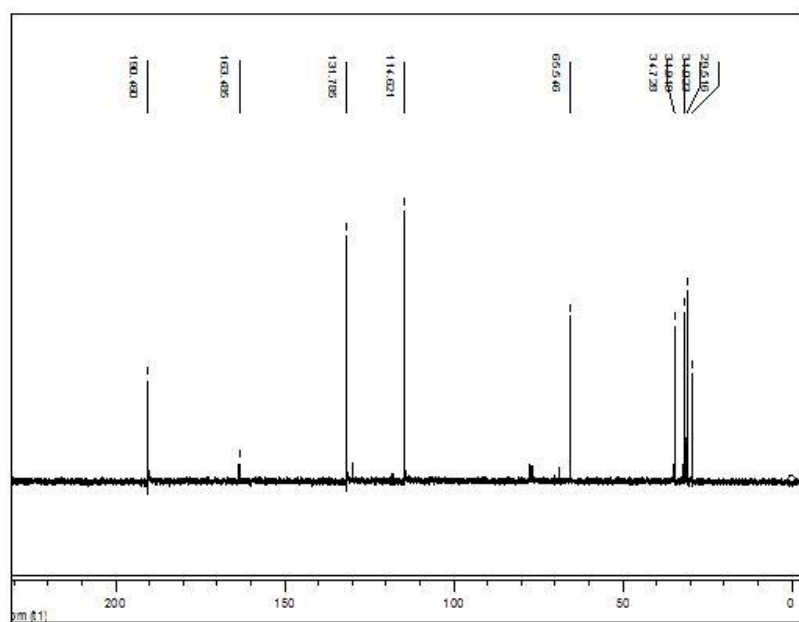

**Fig. S8**  $^{13}\text{C}$  NMR spectrum of compound **BODIPY-1**

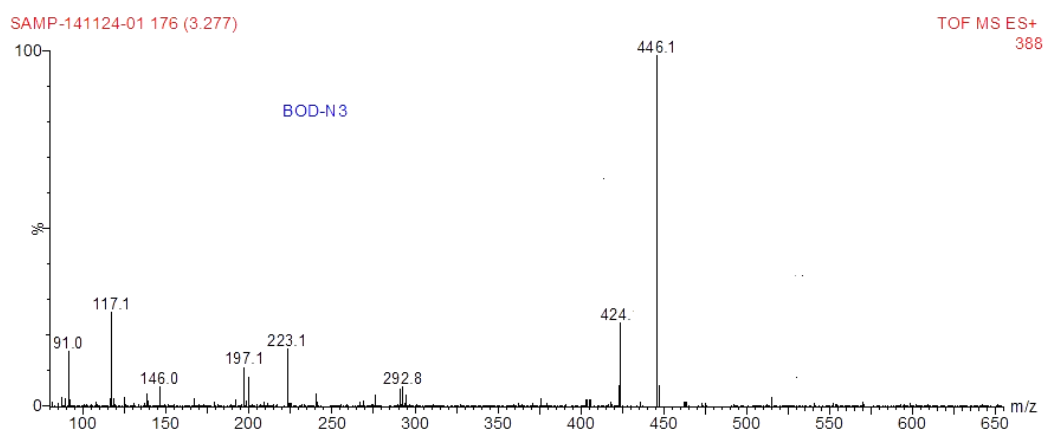

**Fig. S9** Mass Spectrum of compound **BODIPY-1**

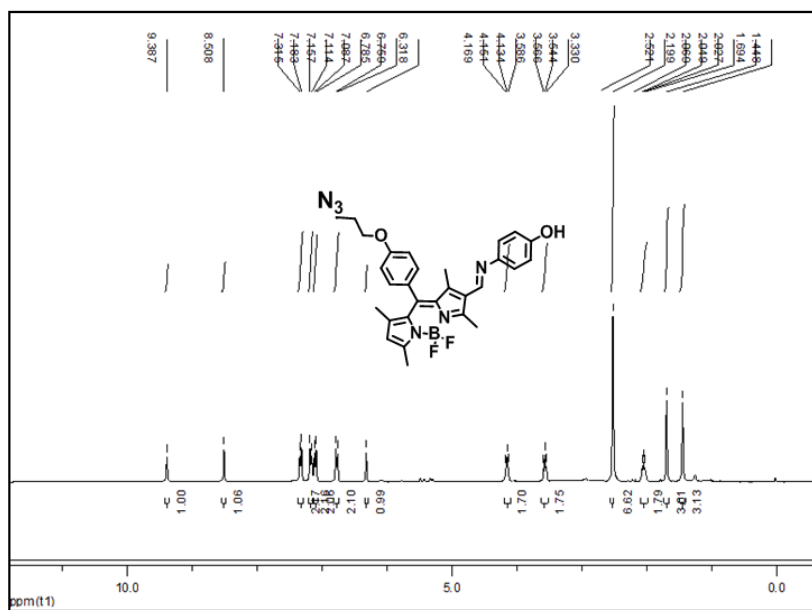

Fig. S10 <sup>1</sup>H NMR spectrum of compound **BODIPY-OH**

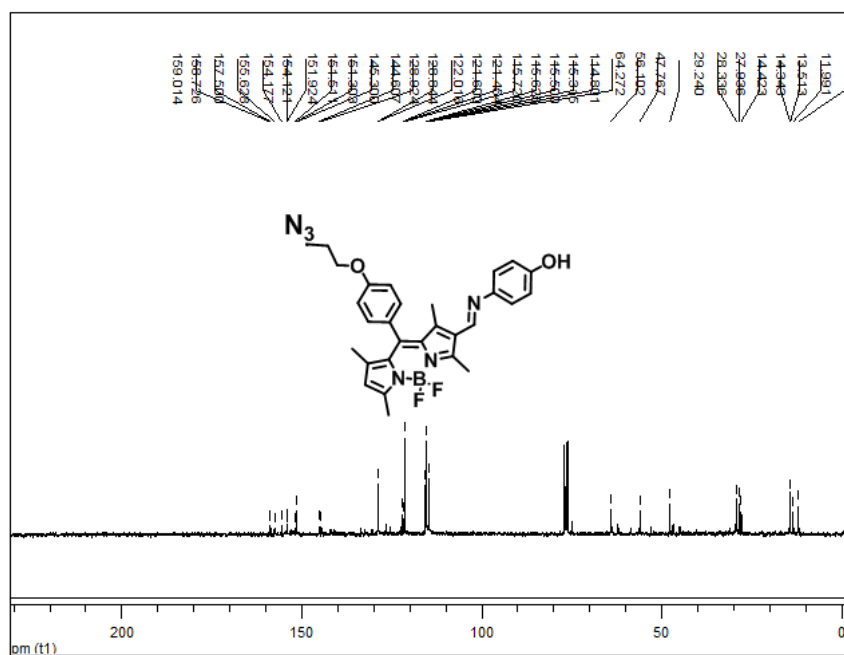

Fig. S11 <sup>13</sup>C NMR spectrum of compound **BODIPY-OH**

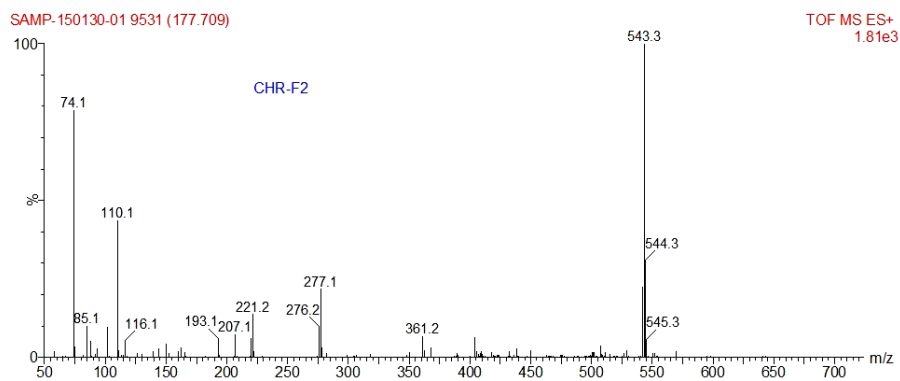

**Fig. S12** Mass Spectrum of compound **BODIPY-OH**

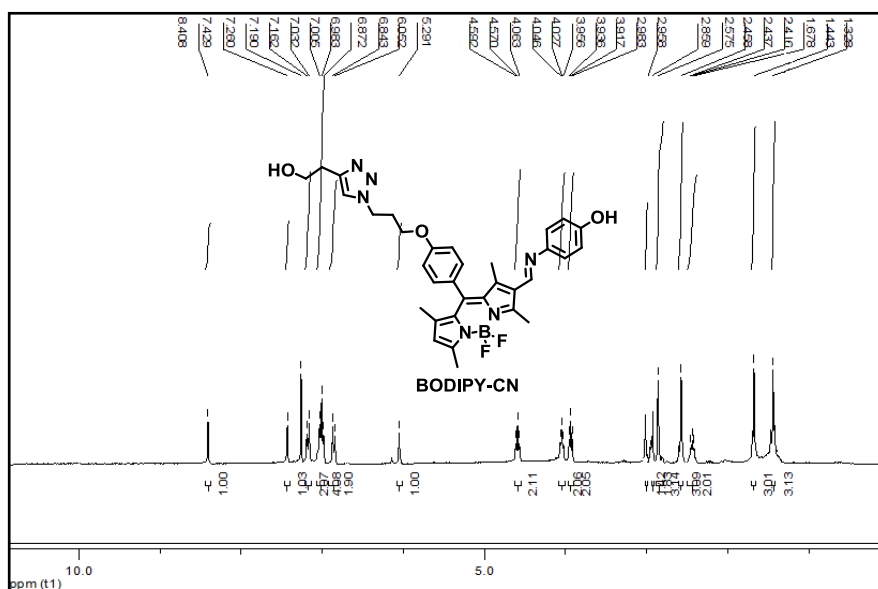

**Fig. S13**  $^1\text{H}$  NMR spectrum of compound **BODIPY-TRIA**

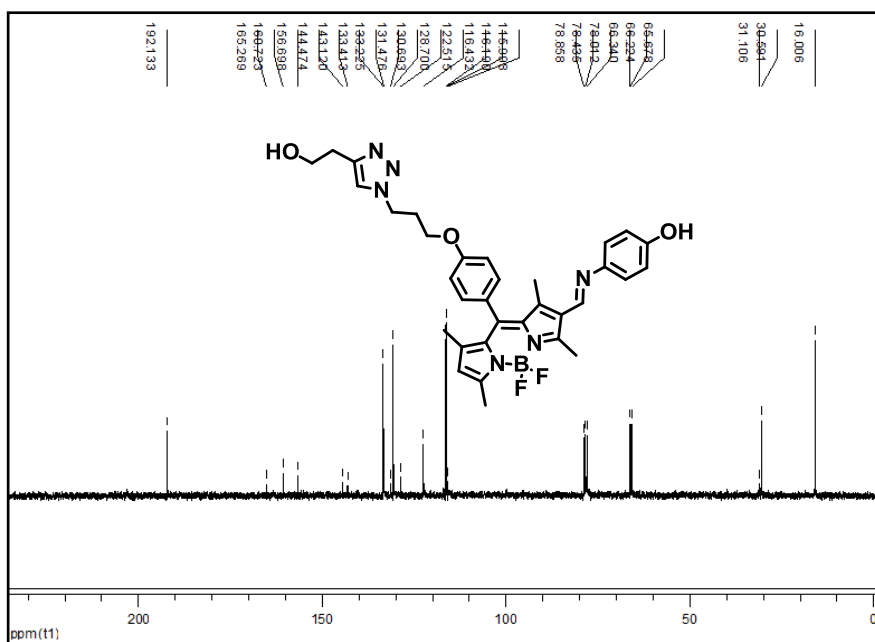

Fig. S14  $^{13}\text{C}$  NMR spectrum of compound **BODIPY-TRIA**

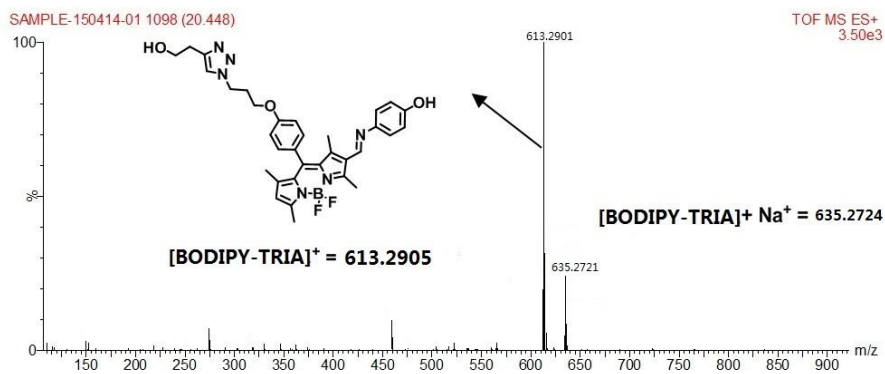

Fig. S15 Mass Spectrum of compound **BODIPY-TRIA**



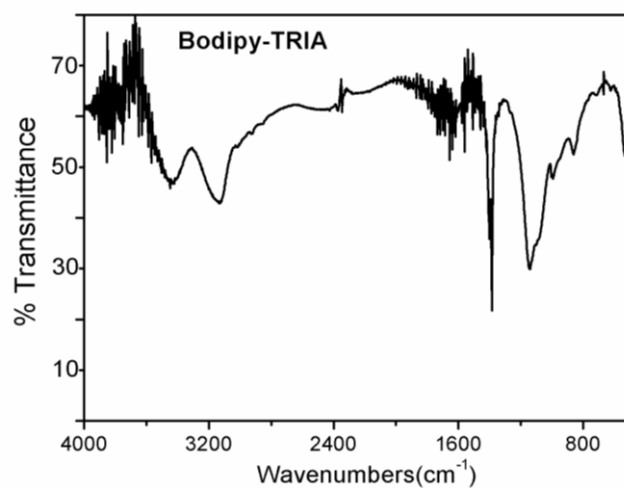

**Fig. S16** FTIR spectra of compound **BODIPY-TRIA**

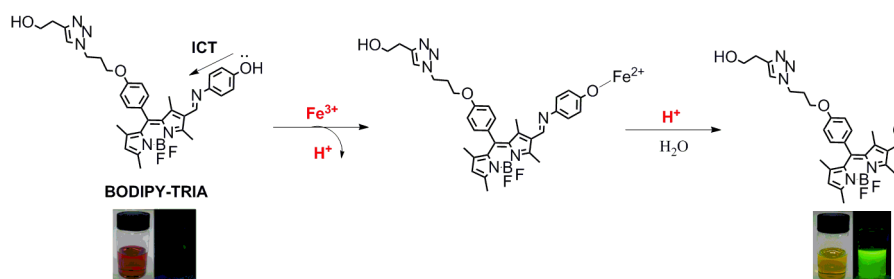

**Fig. S17** The possible mechanism of **BODIPY-TRIA** toward  $\text{Fe}^{3+}$  in THF.
